# Supplementary material for: Engineering aBacillus subtilisesterase for selective hydrolysis ofd,l-menthyl acetate in an organic solvent-free system
Source: Royal Society of Chemistry journal article supplement (doi:10.1039/d3ra00490b), 2023-01-01
Supplement: d3ra00490b1.pdf [file d3ra00490b1.pdf]

## Supporting Information

Engineering a *Bacillus subtilis* esterase for selective hydrolysis of D, L-menthyl acetate in an organic solvent-free system

Jingjing Qiao,<sup>a</sup> Duxia Yang,<sup>a</sup> Yingting Feng,<sup>a</sup> Wan Wei,<sup>a</sup> Xun Liu,<sup>a</sup> Yinjun Zhang,<sup>a</sup> Jianyong Zheng<sup>a,\*</sup> and Xiangxian Ying<sup>b,\*</sup>

<sup>a</sup> Key Laboratory of Bioorganic Synthesis of Zhejiang Province, College of Biotechnology and Bioengineering, Zhejiang University of Technology, Hangzhou 310014, China. Email: [zjy821212@zjut.edu.cn](mailto:zjy821212@zjut.edu.cn)

<sup>b</sup> Hangzhou Hyproven Biopharm Co., Ltd., Hangzhou 311107, China. Email: [yingxx@zjut.edu.cn](mailto:yingxx@zjut.edu.cn)

### Table of Contents

|                                                                                                                                                     |    |
|-----------------------------------------------------------------------------------------------------------------------------------------------------|----|
| Supplementary tables .....                                                                                                                          | 2  |
| Table S1 The primers for site-directed mutagenesis of the esterase pnbA-BS in alanine scanning .....                                                | 2  |
| Table S2 The primers for site-saturation mutagenesis of the residue Ala400 of the esterase pnbA-BS.....                                             | 4  |
| Supplementary figures.....                                                                                                                          | 6  |
| Figure S1 The codon-optimized nucleotide sequence encoding then esterase pnbA-BS .....                                                              | 6  |
| Figure S2 The GC chromatogram of the standards of substrate and product. ....                                                                       | 7  |
| Figure S3 GC-MS analyses of substrate and product. ....                                                                                             | 8  |
| Figure S4 The <sup>1</sup> H NMR (a) and <sup>13</sup> C NMR (b) analyses of the product L-menthol. ....                                            | 9  |
| Figure S5 SDS-PAGE (12%) analysis of pnbA-BS and its variants in alanine scanning. ....                                                             | 10 |
| Figure S6 The docking analysis of the esterase pnbA-BS and its variant A400P on the selective hydrolysis of D, L-menthyl acetate. ....              | 11 |
| Figure S7 SDS-PAGE (12%) analysis of the esterase pnbA-BS and its variants in the saturation mutagenesis of the residue A400. ....                  | 12 |
| Figure S8 Catalytic performances of the purified esterase pnbA-BS and its variant A400P in the hydrolysis of D, L-menthyl acetate to L-menthol..... | 13 |
| Figure S9 Key factors affecting whole-cell catalyzed hydrolysis of D, L-menthyl acetate to L-menthol. ....                                          | 14 |

### Supplementary tables

**Table S1** The primers for site-directed mutagenesis of the esterase pnbA-BS in alanine scanning

| Primer |   | Sequence                                   |
|--------|---|--------------------------------------------|
| G105A  | F | 5'-ATGGTTTGGATTCATGCTGGTGCATTTTATCTG-3'    |
|        | R | 5'-CACCCAGATAAAAATGCACCAGCATGAATCCAA-3'    |
| G106A  | F | 5'-ATGGTTTGGATTCATGGTGGTGCATTTTATCTG-3'    |
|        | R | 5'-CACCCAGATAAAAATGCAGCACCATGAATCCAA-3'    |
| A107G  | F | 5'-CATGGTGGTGGTTTTTATCTGGGTGCAGGTAGCG-3'   |
|        | R | 5'-CAGATAAAAACCACCACCATGAATCCAAACCATAAC-3' |
| A107V  | F | 5'-ATGGTTTGGATTCATGGTGGTGTATTTTATCTG-3'    |
|        | R | 5'-CACCCAGATAAAAATACACCACCATGAATCCAA-3'    |
| A190G  | F | 5'-TGGTGAAAGCGTAGGTGGTATGAGTAT-3'          |
|        | R | 5'-ATACTCATACCACCTACGCTTTCACCA-3'          |
| A190V  | F | 5'-GGTGAAAGCGTTGGTGGTATGAGTATTGCTGCACTG-3' |
|        | R | 5'-CATACCACCAACGCTTTCACCAAAAACGGTAACATT-3' |
| E188A  | F | 5'-CGTTTTTGGTGCAAGCGCAGGTGGTATGA-3'        |
|        | R | 5'-TCATACCACCTGCGCTTGCACCAAAAACG-3'        |
| S189A  | F | 5'-CCGTTTTTGGTGAAGCAGCAGGTGGTATG-3'        |
|        | R | 5'-CATACCACCTGCTGCTTTCACCAAAAACGG-3'       |
| M193A  | F | 5'-GGTGGTGCAAGTATTGCTGCACTGCTGGCA-3'       |
|        | R | 5'-AATACTGCACCACCTGCGCTTTCACCA-3'          |
| T326A  | F | 5'-GCATTCTCAGGAAGCATTGATGCAGCACT-3'        |
|        | R | 5'-AGTGTGCATCAAATGCTCCTGAGAATGC-3'         |
| A330G  | F | 5'-ATTTGATGCAGTACTGGAATATCTGCTGG-3'        |
|        | R | 5'-CCAGCAGATATTCCAGTACTGCATCAAAT-3'        |
| A330V  | F | 5'-GATGCAGTCTGGAATATCTGCTGGGTCAGC-3'       |
|        | R | 5'-TTCCAGCACTGCATCAAATGTTTCCTGAGAATGC-3'   |
| L331A  | F | 5'-ACATTTGATGCAGCAGCAGAATATCTGCTG-3'       |
|        | R | 5'-CAGCAGATATTCTGCTGCTGCATCAAATGT-3'       |
| M358A  | F | 5'-CATATGGCAACCGATCTGCTGTTTTGGCGT-3'       |
|        | R | 5'-ATCGGTTGCCATATGAATCTGGCTTTCAGGC-3'      |
| A400G  | F | 5'-GCATTTTCTGACTGGAAGTCCGTTTGT-3'          |
|        | R | 5'-AGTTCCAGTCCATGAAATGCTTTATTATACGGCG-3'   |
| A400V  | F | 5'-GCATTTTCTGACTGGAAGTCCGTTTGT-3'          |
|        | R | 5'-AGTTCCAGTACATGAAATGCTTTATTATACGGCG-3'   |

---

|       |   |                                       |
|-------|---|---------------------------------------|
| L403A | F | 5'-TTCATGCACTGGAAGCACCGTTTGTGTTTTG-3' |
|       | R | 5'-CAAAAACAAACGGTGCTCCAGTGCATGAA-3'   |

---

**Table S2** The primers for site-saturation mutagenesis of the residue Ala400 of the esterase pnbA-BS

| Primer |   | Sequence                                |
|--------|---|-----------------------------------------|
| A400P  | F | 5'-GCATTCATCCTCTGGAAGTCCGTTTGTTT-3'     |
|        | R | 5'-AGTTCAGAGGATGAAATGCTTTATTATACGGCG-3' |
| A400K  | F | 5'-GCATTCATAAACTGGAAGTCCGTTTGTTT-3'     |
|        | R | 5'-AGTTCAGTTTATGAAATGCTTTATTATACGGCG-3' |
| A400Q  | F | 5'-GCATTCATGAACTGGAAGTCCGTTTGTTT-3'     |
|        | R | 5'-AGTTCAGTTCATGAAATGCTTTATTATACGGCG-3' |
| A400R  | F | 5'-GCATTCATCGACTGGAAGTCCGTTTGTTT-3'     |
|        | R | 5'-AGTTCAGTCGATGAAATGCTTTATTATACGGCG-3' |
| A400H  | F | 5'-GCATTCATCACCTGGAAGTCCGTTTGTTT-3'     |
|        | R | 5'-AGTTCAGGTGATGAAATGCTTTATTATACGGCG-3' |
| A400L  | F | 5'-GCATTCATCTACTGGAAGTCCGTTTGTTT-3'     |
|        | R | 5'-AGTTCAGTAGATGAAATGCTTTATTATACGGCG-3' |
| A400E  | F | 5'-GCATTCATCAGCTGGAAGTCCGTTTGTTT-3'     |
|        | R | 5'-AGTTCAGCTGATGAAATGCTTTATTATACGGCG-3' |
| A400T  | F | 5'-GCATTCATACCCTGGAAGTCCGTTTGTTT-3'     |
|        | R | 5'-AGTTCAGGGTATGAAATGCTTTATTATACGGCG-3' |
| A400I  | F | 5'-GCATTCATATCCTGGAAGTCCGTTTGTTT-3'     |
|        | R | 5'-AGTTCAGGATATGAAATGCTTTATTATACGGCG-3' |
| A400N  | F | 5'-GCATTCATAACCTGGAAGTCCGTTTGTTT-3'     |
|        | R | 5'-AGTTCAGGTTATGAAATGCTTTATTATACGGCG-3' |
| A400F  | F | 5'-GCATTCATTCCTGGAAGTCCGTTTGTTT-3'      |
|        | R | 5'-AGTTCAGGAAATGAAATGCTTTATTATACGGCG-3' |
| A400M  | F | 5'-GCATTCATTAAGTGAAGTCCGTTTGTTT-3'      |
|        | R | 5'-AGTTCAGTTAATGAAATGCTTTATTATACGGCG-3' |
| A400D  | F | 5'-GCATTCATGACCTGGAAGTCCGTTTGTTT-3'     |
|        | R | 5'-AGTTCAGGTCATGAAATGCTTTATTATACGGCG-3' |
| A400V  | F | 5'-GCATTCATGTAAGTGAAGTCCGTTTGTTT-3'     |
|        | R | 5'-AGTTCAGTACATGAAATGCTTTATTATACGGCG-3' |
| A400C  | F | 5'-GCATTCATTGCCTGGAAGTCCGTTTGTTT-3'     |
|        | R | 5'-AGTTCAGGCAATGAAATGCTTTATTATACGGCG-3' |
| A400S  | F | 5'-GCATTCATCACTGGAAGTCCGTTTGTTT-3'      |

---

|       |   |                                          |
|-------|---|------------------------------------------|
|       | R | 5'-AGTTCCAGTGAATGAAATGCTTTATTATACGGCG-3' |
| A400G | F | 5'GCATTCATGGACTGGAAGTCCGTTTGTTT-3'       |
|       | R | 5'-AGTTCCAGTCCATGAAATGCTTTATTATACGGCG-3' |
| A400Y | F | 5'-GCATTCATTATCTGGAAGTCCGTTTGTTT-3'      |
|       | R | 5'-AGTTCCAGATAATGAAATGCTTTATTATACGGCG    |
| A400W | F | 5'-GCATTCATTGGCTGGAAGTCCGTTTGTTT-3'      |
|       | R | 5'-AGTTCCAGCCAATGAAATGCTTTATTATACGGCG-3' |

---

### Supplementary figures

ATGACCCATAAAACCGTGACCACCCATTATGGTAAAGTTAAAGGTACCACCGAAAAACGGCGTGTCATATCT  
GGAAAGGTATTCCGTATGCCAAACCGCCGATCGGCCAGCTGCGCTTTAAAGCACCTGAACCACCGGAAGT  
TTGGGAAGATATCCTGGATGCAACAGCATATGGCCCGATTTGTCCGAGCCGCCGGATCTGCTGAGTCTG  
TCATATGCAGAACTGCCTCAGCAGAGCGAAGATTGTCTGTATGTTAATGTTTTTGCGCCGGATACCCCGAG  
CCAGAATCTGCCTGTTATGGTTTGGATTTCATGGTGGTGCATTTTATCTGGGTGCAGGTAGCGAACCTCTGT  
ATGATGGTAGCCGTCTGGCGGCCAGGGTGAAGTTATTGTTGTTACGCTGAATTATCGTCTGGGTCCGTTT  
GGTTTTCTGCATCTGAGCAGCTTTGATGAAGCATATAGTGATAATCTGGGTCTGCTGGATCAGGCAGCAG  
CACTGAAATGGGTGCGTGATAATATTAGCGCATTGGTGGTATCCGGATAATGTTACCGTTTTTGGTGA  
AAGCGCAGGTGGTATGAGTATTGCTGCACTGCTGGCAATGCCGGCAGCAAAAGGTCTGTTTCAGAAAGC  
AATTATGGAAAGCGGTGCAAGCCGTACCATGACCAAAGAAAAAGCAGCAAGCACAGCAGCAGCCTTTCT  
GCAGGTTCTGGGTATTTTCAGAAAGCCAGCTGGATCGTCTGCATACAGTAAGCGCAGAAGATCTGCTGAAC  
GCAGCCGATCAGCTGCGTAAAGCAGAAAATGAAAATCTGTTTCAGCTGCTGTTTCAGCCGGTCTGGATC  
CGAAAACCTGCCAGCCGAACCAGAAAAAGCAATTGCAGAAGGTACCGCAGCAGGTATCCCACTGCTGA  
TTGGTACCAATCGTGATGAAGTTATCTGTTTTTTACACCGGATAGTGATGTGCATTCTCAGGAAACATTT  
GATGCAGCACTGGAATATCTGCTGGGTGAGCCGCTGGCAAAAAAGCAGCAGATCTGTATCCGCGTAGCC  
TGAAAGCCAGATTCATATGATGACCGATCTGCTGTTTTGGCGTCCGGCAGTTGCATGTGCAAGCGCACA  
GAGCCATTATGCACCGTTTTGGATGTATCGTTTTGATTGGCATAGCGATAAACCGCCGTATAATAAAGCAT  
TTCATGCACTGGAAGTAAACAGCTGAGCCATACCGTTCAGAGCGCATGGACCACCTTTGCAAAAACCGGTAATC  
CGAGCACCGAAGATGTTAAATGGCCGGCATATCATGAAGAAACCCGTGAAACCCTGATTCTGGAAAGCG  
AAATTAGCATTGAAAATGATCCGGAAAGCGAAAAACGTCAGAAAATGTTCCGAGCAAAGGTGAATAA

**Figure S1** The codon-optimized nucleotide sequence encoding then esterase pnbA-BS.

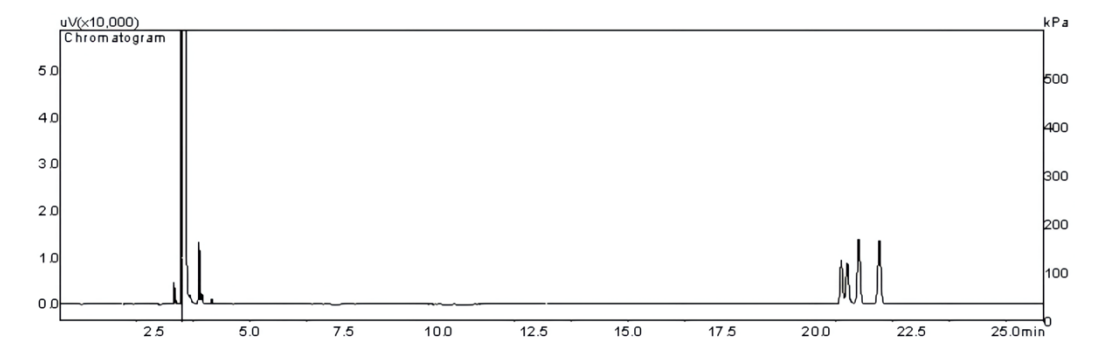

**Figure S2** The GC chromatogram of the standards of substrate and product. The retention times of D-menthol, L-menthol, L-menthyl acetate and D-menthyl acetate were 20.615 min, 20.774 min, 21.097 min and 21.638 min, respectively.

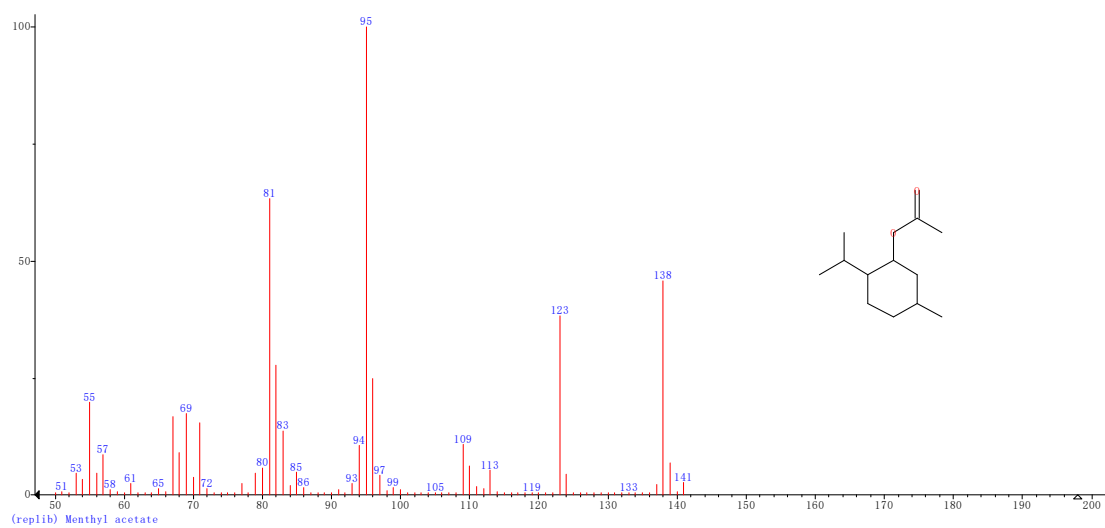

(a)

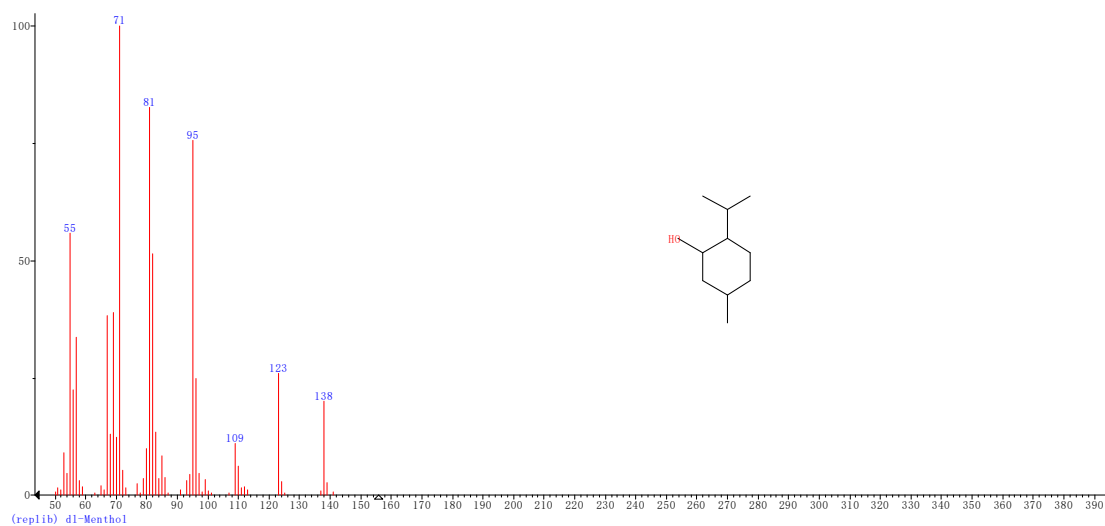

(b)

**Figure S3** GC-MS analyses of substrate and product. (a), GC-MS chromatogram for menthyl acetate (MW 198). (b), GC-MS chromatogram for menthol (MW 156).



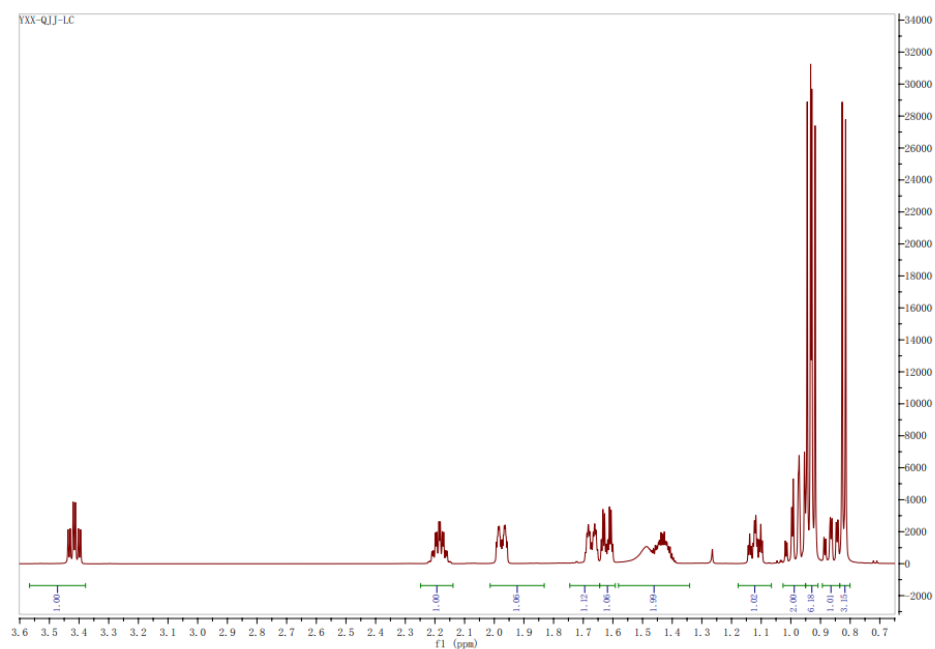

(a)

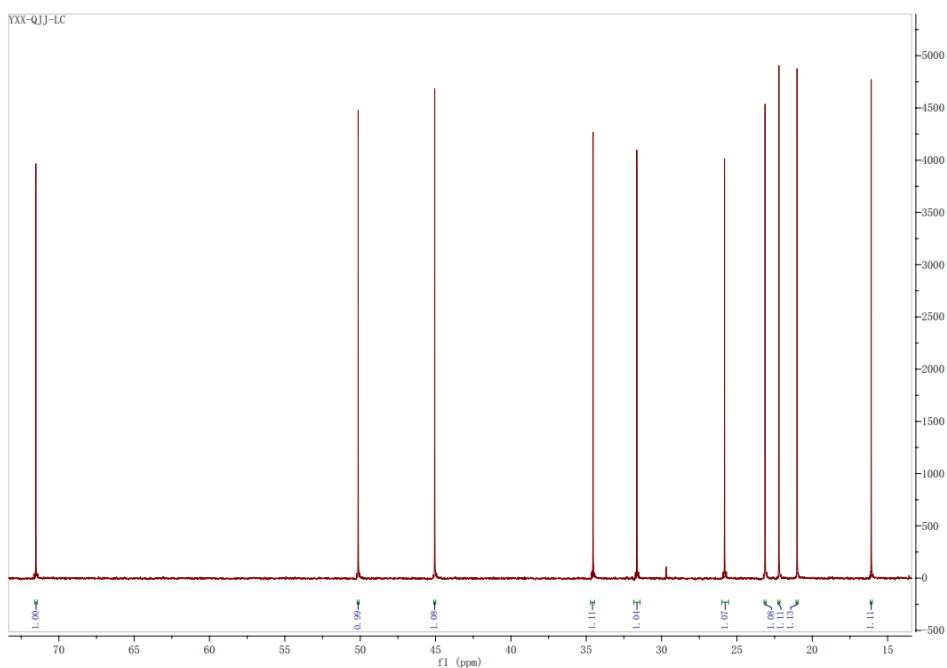

(b)

**Figure S4** The  $^1\text{H}$  NMR (a) and  $^{13}\text{C}$  NMR (b) analyses of the product L-menthol. (a),  $^1\text{H}$  NMR (600 MHz,  $\text{CDCl}_3$ )  $\delta$  3.42 (td,  $J=10.5, 4.3$  Hz, 1H), 2.25–2.14 (m, 1H), 2.01–1.83 (m, 1H), 1.75–1.64 (m, 1H), 1.64–1.59 (m, 1H), 1.58–1.34 (m, 2H), 1.18–1.07 (m, 1H), 1.03–0.95 (m, 2H), 0.93 (dd,  $J=9.3, 6.8$  Hz, 6H), 0.89–0.84 (m, 1H), 0.82 (d,  $J=7.0$  Hz, 3H). (b),  $^{13}\text{C}$  NMR (151 MHz,  $\text{CDCl}_3$ )  $\delta$  71.52 (s), 50.14 (s), 45.06 (s), 34.55 (s), 31.64 (s), 25.82 (s), 23.14 (s), 22.21 (s), 21.01 (s), 16.09 (s).

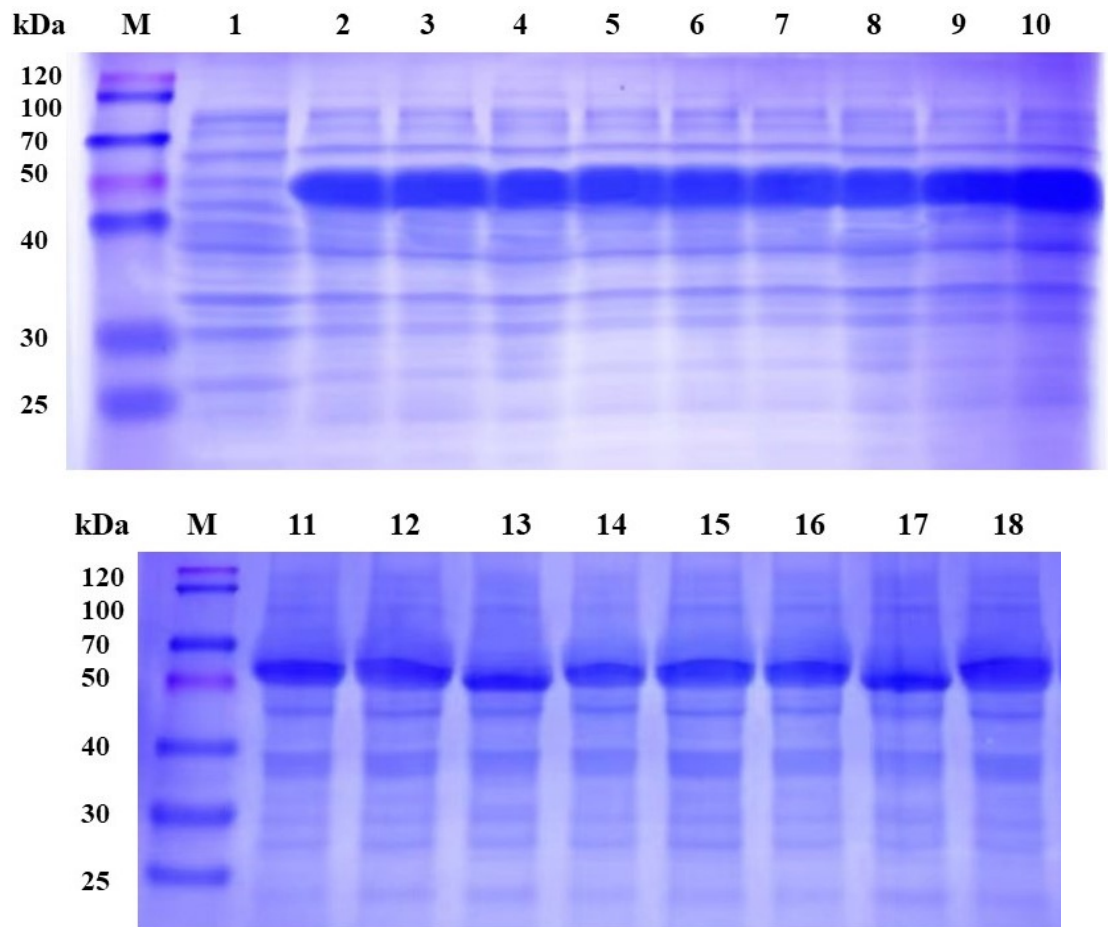

**Figure S5** SDS-PAGE (12%) analysis of pnbA-BS and its variants in alanine scanning. Lane M, standard molecular mass proteins; lane 1, the host strain *E. coli* BL21(DE3); lane 2, wild type pnbA-BS. Other lanes from 3 to 18 represent the pnbA-BS variants (from left to right): G105A, G106A, A107G, A107V, E188A, A190G, A190V, M193A, T326A, A330G, A330V, L331A, M358A, A400G, A400V and L403A. The proteins were visualized by staining with Coomassie brilliant blue R-250.

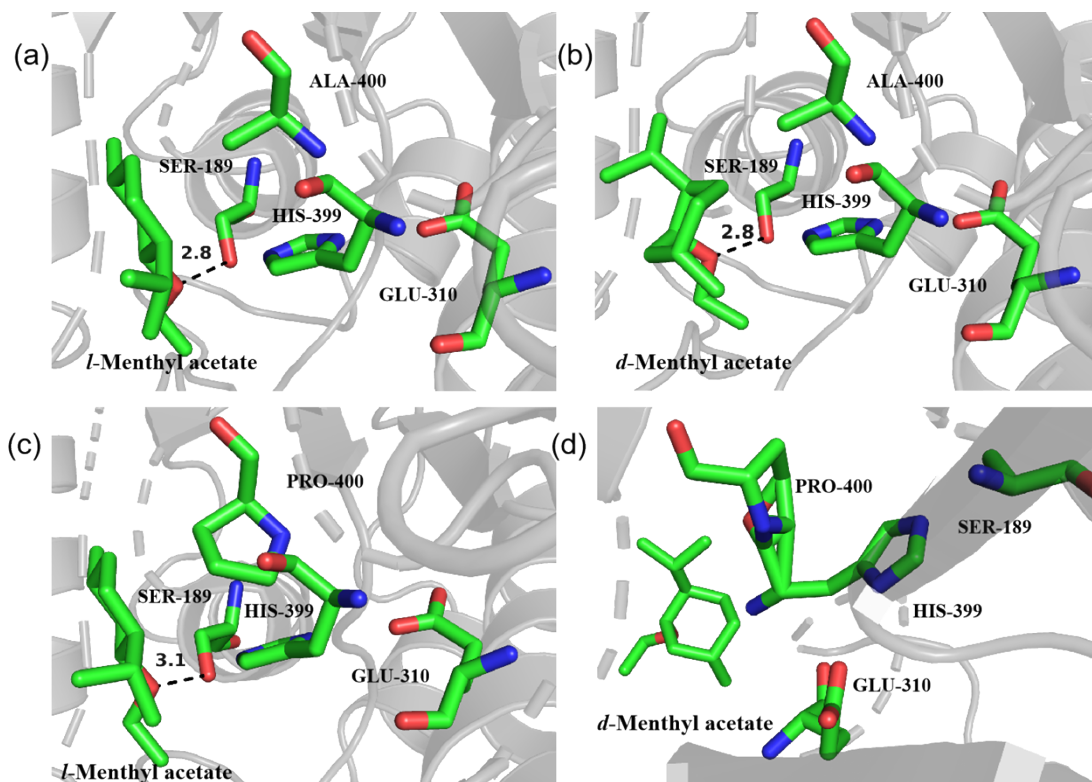

**Figure S6** The docking analysis of the esterase pnbA-BS and its variant A400P on the selective hydrolysis of D, L-menthyl acetate. (a) pnbA-BS and L-menthyl acetate; (b) pnbA-BS and D-menthyl acetate; (c) pnbA-BS A400P and L-menthyl acetate; (d) pnbA-BS A400P and D-menthyl acetate. Green, carbon; blue, nitrogen; orange, oxygen.

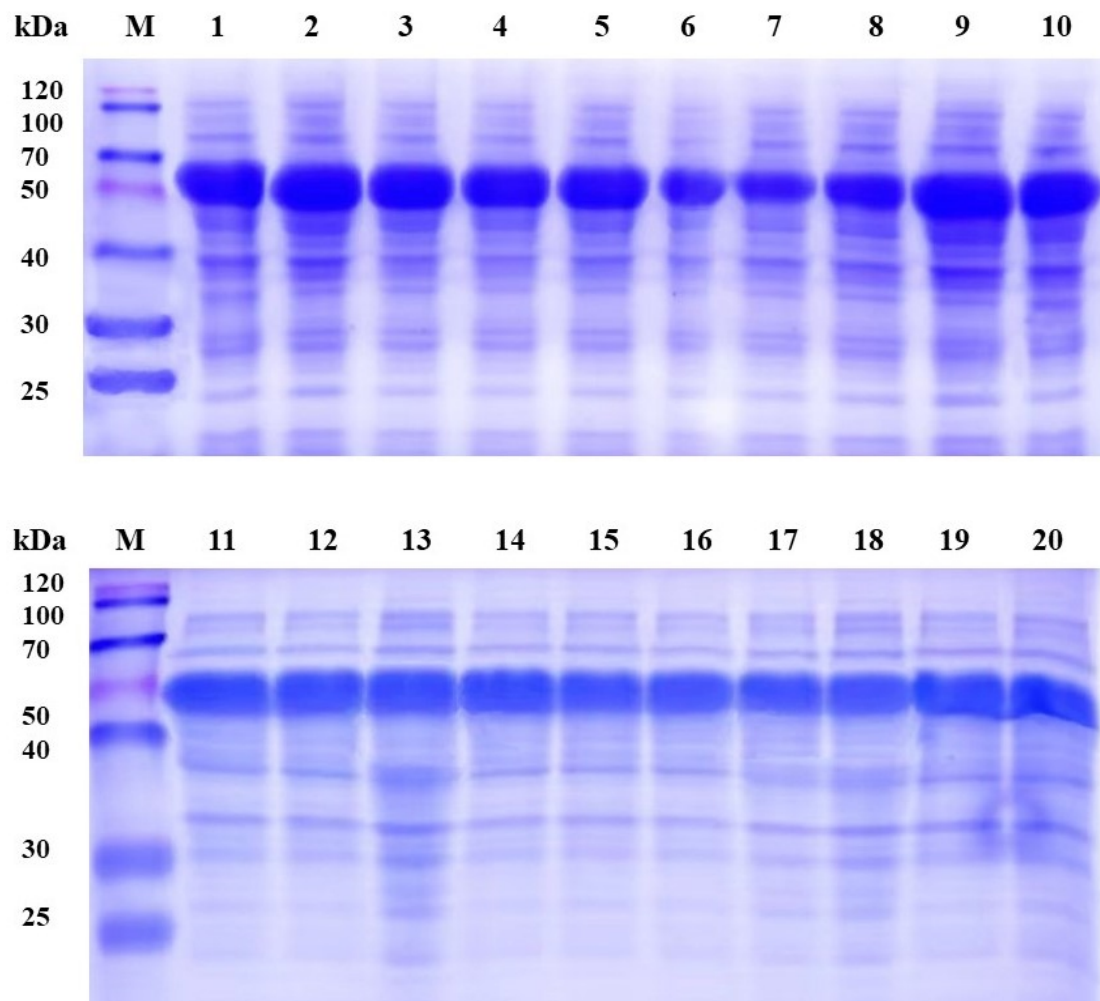

**Figure S7** SDS-PAGE (12%) analysis of the esterase pnbA-BS and its variants in the saturation mutagenesis of the residue A400. Lane M, standard molecular mass proteins; lane 1, wild type pnbA-BS. Other lanes from 2 to 20 represent the pnbA-BS variants (from left to right): A400P, A400K, A400Q, A400R, A400H, A400M, A400L, A400E, A400T, A400I, A400N, A400F, A400D, A400V, A400C, A400S, A400G, A400Y and A400W. The proteins were visualized by staining with Coomassie brilliant blue R-250.

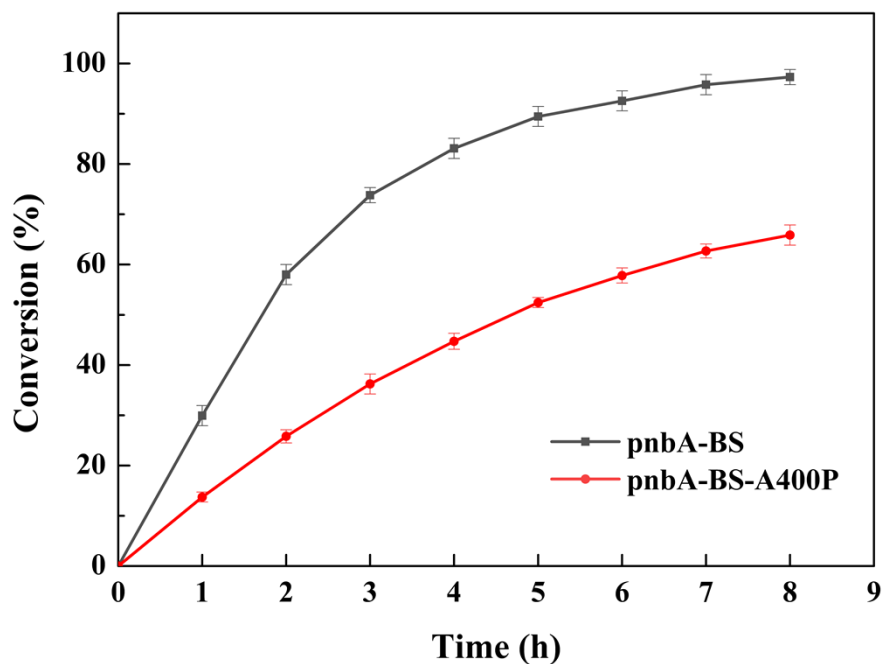

**Figure S8** Catalytic performances of the purified esterase pnbA-BS and its variant A400P in the hydrolysis of D, L-menthyl acetate to L-menthol. The reaction mixture (10 ml) contained 500 mM L-menthyl acetate, 70 mg purified pnbA-BS or its variant A400P, and 100 mM PBS buffer (pH 8.0). The reaction was conducted in an orbital shaker (600 rpm, 30 °C) for 8 h meanwhile pH 8.0 was constantly maintained by the titration of 1 M NaOH. The experiments were conducted in triplicate.

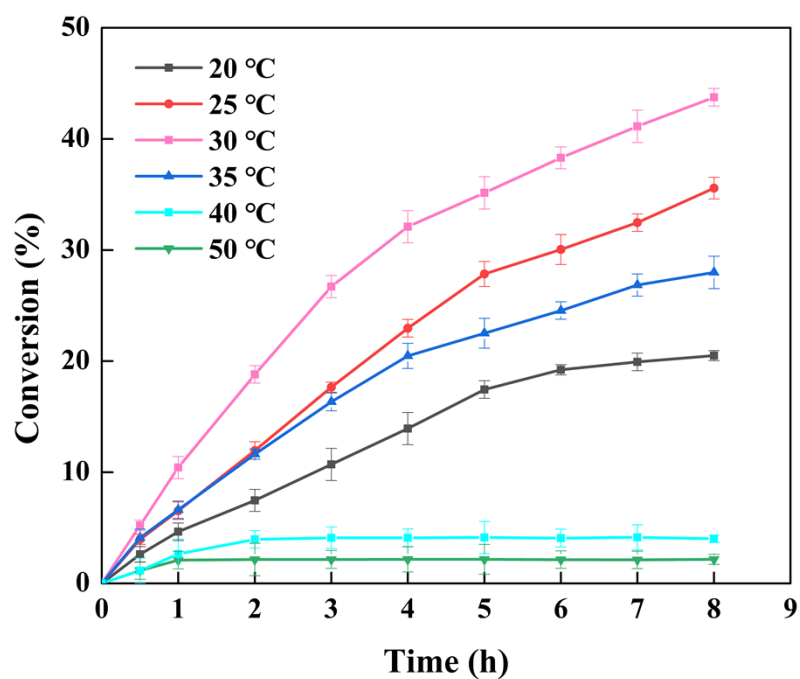

(a)

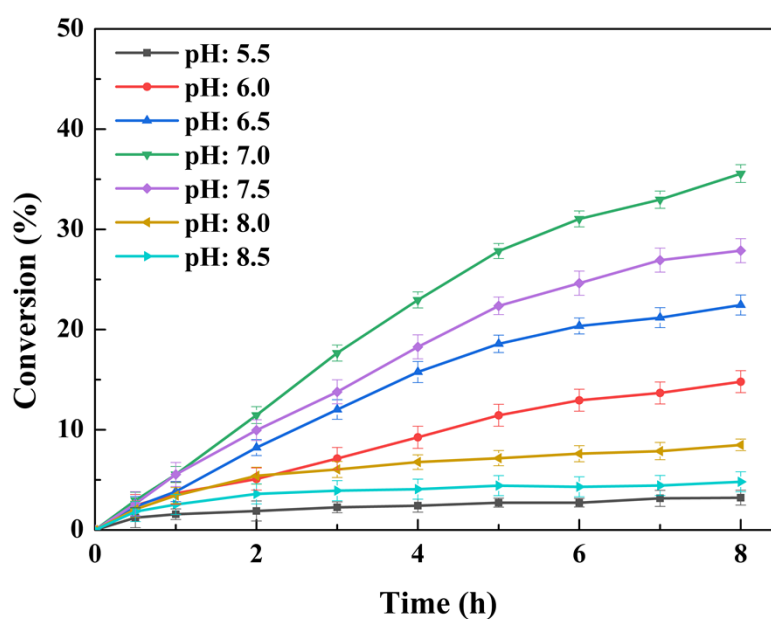

(b)

**Figure S9** Key factors affecting whole-cell catalyzed hydrolysis of D, L-menthyl acetate to L-menthol. The standard reaction mixture (10 ml) contained 500 mM D, L-menthyl acetate, 0.2 g lyophilized cells expressing pnbA-BS or its variant, and 100 mM PBS buffer (pH 7.0). The reaction was conducted in a reactor with a pH auto-titration system at 600 rpm for 8 h. The temperature was investigated from 20 to 45 °C (a) and the pH values were explored from 5.5 to 8.5 (b). Data present mean values  $\pm$  SD from three independent experiments.
